# Supplementary material for: Syntheses, structures, magnetic, and spectroscopic properties of cobalt(ii), nickel(ii) and zinc(ii) complexes containing 2-(6-methyl)pyridyl-substituted nitronyl and imino nitroxide†
Source: Royal Society of Chemistry journal article supplement (doi:10.1039/b103647p), 2001-01-01
Supplement: b103647p.doc [file b103647p.doc]

##### Supplementary information

Syntheses, structures, magnetic, and spectroscopic properties of cobalt(II), nickel(II) and zinc(II) complexes containing 2-(6-methyl)-pyridyl-substituted nitronyl and imino nitroxides

**Youhei Yamamoto, Takayoshi Suzuki and Sumio Kaizaki***

**Contents**

Figure S1 (*a*) Packing diagram of [CoCl2(NITmepy)] **1** viwed along crystallographic *a* axis; and (*b*) closest intermolecular contacts of [CoCl2(NITmepy)] **1** in the crystal (symmetry operation for the primed atoms: *x*+1, *y*, *z*; only Co, imino nitroxide and pyridine moieties are shown for clarity).

Figure S2 Packing diagram of [CoCl2(IMmepy)] **2**.

Figure S3 Solvent-dependence of (*a*) UV-vis absorption and (*b*) MCD spectra of **1** in a mixture of dichloromethane and acetonitrile at room temperature [(*a*) CH2Cl2:CH3CN = 10:0, 9:1, 8:2, 6:4, 4:6, 2:8 and 0:10; (*b*) CH2Cl2:CH3CN = 10:0, 8:2, 5:5 and 0:10].

Figure S4 UV-vis-NIR absorption spectra of [CoCl2(NITmepy)] **1** in dichloromethane (———), CoCl2•6H2O in acetonitrile (- - - - -) and NITmepy in dichloromethame (– • – • –) at room temperature.

Figure S5 UV-vis-NIR absorption spectra of [CoCl2(IMmepy)] **2** in dichloromethane (———), CoCl2•6H2O in acetonitrile (- - - - -) and IMmepy in dichloromethame (– • – • –) at room temperature.

Figure S6 Temperature-dependence of the anisotropic magnetic properties for complex **1Br** in the form of **(// or ) *vs*. *T* and **(// or )•*T* *vs*. *T*. The **// denotes the molar magnetic susceptibility when the crystallographic *a* axis parallels to the magnetic field, and the ** does that when the *a* axis is directed to the perpendicular magnetic field.

**Figure S1** (*a*) Packing diagram of [CoCl2(NITmepy)] **1** viwed along crystallographic *a* axis; and (*b*) closest intermolecular contacts of [CoCl2(NITmepy)] **1** in the crystal (symmetry operation for the primed atoms: *x*+1, *y*, *z*; only Co, imino nitroxide and pyridine moieties are shown for clarity).

**Figure S2** Packing diagram of [CoCl2(IMmepy)] **2**.

**Figure S3** Solvent-dependence of (*a*) UV-vis absorption and (*b*) MCD spectra of **1** in a mixture of dichloromethane and acetonitrile at room temperature [(*a*) CH2Cl2:CH3CN = 10:0, 9:1, 8:2, 6:4, 4:6, 2:8 and 0:10; (*b*) CH2Cl2:CH3CN = 10:0, 8:2, 5:5 and 0:10].

**Figure S4** UV-vis-NIR absorption spectra of [CoCl2(NITmepy)] **1** in dichloromethane (———), CoCl2•6H2O in acetonitrile (- - - - -) and NITmepy in dichloromethame (– • – • –) at room temperature.

**Figure S5** UV-vis-NIR absorption spectra of [CoCl2(IMmepy)] **2** in dichloromethane (———), CoCl2•6H2O in acetonitrile (- - - - -) and IMmepy in dichloromethame (– • – • –) at room temperature.

**Figure S6** Temperature-dependence of the anisotropic magnetic properties for complex **1Br** in the form of **(// or ) *vs*. *T* and **(// or )•*T* *vs*. *T*. The **// denotes the molar magnetic susceptibility when the crystallographic *a* axis parallels to the magnetic field, and the ** does that when the *a* axis is directed to the perpendicular magnetic field.
